# Supplementary material for: Orthogonal translation enables heterologous ribosome engineering in E. coli
Source: PubMed Central journal article supplement (PMC7838251; doi:10.1038/s41467-020-20759-z), 2021-01-26
Supplement: 41467_2020_20759_MOESM3_ESM.pdf [file 41467_2020_20759_MOESM3_ESM.pdf]

**Editorial Note:** This manuscript has been previously reviewed at another journal that is not operating a transparent peer review scheme. This document only contains reviewer comments and rebuttal letters for versions considered at *Nature Communications*. Mentions of prior referee reports have been redacted.

Reviewers' Comments:

Reviewer #1:

Remarks to the Author:

In this re-submitted manuscript Kolber and colleagues further refine their study examining the expression of rRNA operons from diverse bacteria in *E. coli*. They improve the text of the manuscript and present new data to address comments from the previous rounds of review. Although ultimately fruitless, I appreciate the authors attempts to biochemically determine if association between the heterologous o-SSUs and native LSUs can occur. This highlights the challenges in engineering such a critical hub for cellular activities. Despite this shortcoming I believe the manuscript is now suitable for publication in *Nature Communications*. This conclusion is based on the substantial new, interesting data presented on the activities of diverse rRNAs in *E. coli*, the contributions of RNA processing and heterologous ribosomal proteins to their activity, and the new methodological advances outlined in the manuscript, including improved O-mRNA reporters. Furthermore, adjustments to the text now clearly highlight the potential pitfalls as well as the advantages for these systems. I look forward to seeing the authors' work online.
